# Supplementary material for: A mid-Cambrian tunicate and the deep origin of the ascidiacean body plan
Source: PubMed Central journal article supplement (PMC10325964; doi:10.1038/s41467-023-39012-4), 2023-07-06
Supplement: 41467_2023_39012_MOESM1_ESM.pdf [file 41467_2023_39012_MOESM1_ESM.pdf]

**SUPPLEMENTARY INFORMATION: A mid-Cambrian tunicate and the deep origin of the ascidiacean body plan**

| <b>Taxon</b>                        | <b>General description</b>                                                                                                             | <b>Age</b>                                              | <b>Reference</b>                                                             |
|-------------------------------------|----------------------------------------------------------------------------------------------------------------------------------------|---------------------------------------------------------|------------------------------------------------------------------------------|
| <i>Ausia fenestrata</i>             | Internal cast of a pliable, sac-shaped organism, with perforations that may be similar to the pharyngeal basket of tunicates.          | Vendian                                                 | Fedonkin et al. 2012                                                         |
| <i>Burykhia hunti</i>               | Internal cast of a pliable, sac-shaped organism, with perforations that may be similar to the pharyngeal basket of tunicates.          | Vendian                                                 | Fedonkin et al. 2012                                                         |
| <i>Shankouclava<br/>anningense</i>  | Sac-like body with a stalk and single, presumably oral siphon. Perforated branchial basket; possible atrial pore and endostyle.        | Cambrian<br>(Stage 3)                                   | Chen et al. 2003                                                             |
| <i>Megasiphon<br/>thylakos</i> nov. | Sac-like, unstalked body with paired siphons and a large atrial cavity.<br>Prominent longitudinal muscles, thinner transverse muscles. | Cambrian<br>(Drumian)                                   | Current study                                                                |
| <i>Khmeria</i> spp.                 | Cone-shaped or club-like, with growth lines, an operculum, and a calcareous exoskeleton.                                               | Triassic                                                | Wendt 2018                                                                   |
| <i>Zardinosoma</i> spp.             | Club-like or globose, with multiple opercula and a calcareous exoskeleton.                                                             | Triassic                                                | Wendt 2018                                                                   |
| Didemnid spicules                   | Eight morphotypes of spicules belonging to the tunicate family Didemnidae, roughly spherical with most having spikes.                  | Triassic<br>(Carnian) to<br>Quaternary<br>(Pleistocene) | Varol & Houghton,<br>1996; Łukowiak et al.<br>2016 and references<br>therein |

**Supplemental table 1. Index of published fossil tunicates.** Although tunicates have been reported in the literature, their fossils are extremely rare. Most putative fossil tunicates are either incompletely preserved (e.g. isolated biomineralized spicules<sup>1-3</sup>), have anatomies that are at odds with some aspects of tunicate morphology (e.g. *Shankouclava*<sup>4</sup>) or are problematic and unlikely to represent tunicates at all (e.g. *Ausia* and *Burykhia*<sup>5</sup>). As a result, these fossils have not contributed substantively to discussions regarding

tunicate evolution. Once considered a primitive tunicate<sup>6</sup>, the Silurian taxon *Ainiktozoon* is not listed herein, since it has been convincingly reinterpreted as an arthropod<sup>7</sup>.

## 2. Supplementary Discussion

Alternative affinities for *Megasiphon thylakos*. Based on its age, morphology, and locality of discovery, three possible alternative identities for *Megasiphon thylakos* besides tunicate bear consideration, but all three can be confidently dismissed. The first two are a branching, organic tube or a branching burrow produced by a presumably vermiform animal. For the former, no other fossil tubes from the Cambrian are similar in size and morphology to *M. thylakos*, as demonstrated by Robison and Conway Morris's review<sup>8</sup> of the enigmatic and vermiform taxa from the Cambrian of Utah. The lone fossil that may be comparable is *Margaretia dorus*, which does branch at relatively similar angles as the siphons of *Megasiphon*, and can be of comparable width. However, it is morphologically utterly unlike *Margaretia*, lacking its characteristic series of spirally arranged pores and fibrous construction<sup>9</sup>. Additionally, due to its variety of well-preserved internal anatomical features preserved as carbonaceous films (e.g. musculature), *M. thylakos* is incompatible with identification as a trace fossil, particularly when compared with similarly-sized putative traces from Cambrian deposits<sup>10</sup>. A branching alga remains the last possible alternative, however, there is little which could tie *M. thylakos* to this group. It lacks any clear morphological features characterizing well-known Cambrian taxa interpreted as algae (e.g., holdfasts with branching systems, filamentous texture, sheet or fan-like thallus construction; see<sup>11</sup>, table 1), including those subsequently reinterpreted as animal dwellings<sup>9,10,12</sup>.

## References

1. Varol, O. & Houghton, S. D. A review and classification of fossil didemnid ascidian spicules. *J. Micropalaeontology* **15**, 135–149 (1996).
2. Łukowiak, M., Dumitriu, S. D. & Ionesi, V. First fossil record of early Sarmatian didemnid ascidian spicules (Tunicata) from Moldova. *Geobios* **49**, 201–209 (2016).

3. Wendt, J. The first tunicate with a calcareous exoskeleton (Upper Triassic, northern Italy). *Palaeontology* **61**, 575–595 (2018).
4. Chen, J. Y. *et al.* The first tunicate from the early Cambrian of South China. *Proc. Natl. Acad. Sci. U. S. A.* **100**, 8314–8318 (2003).
5. Fedonkin, M. A., Vickers-Rich, P., Swalla, B. J., Trusler, P. & Hall, M. A new metazoan from the Vendian of the White Sea, Russia, with possible affinities to the ascidians. *Paleontol. J.* **46**, 1–11 (2012).
6. Scourfield, D. J. An anomalous fossil organism, possibly a new type of chordate, from the Upper Silurian of Lesmahagow, Lanarkshire – *Ainiktozoon loganense*, gen. et sp. Nov. *Proc. R. Soc. B* **121**, 533–547 (1937).
7. Van der Bruggen, W., Schram, F. R. & Martill, D. M. The fossil *Ainiktozoon* is an arthropod. *Nature* **385**, 589–590 (1997).
8. Conway Morris, S. & Robison, R. A. More soft-bodied animals and algae from the Middle Cambrian of Utah and British Columbia. *Univ. Kansas Paleontol. Contrib.* (1988).
9. Nanglu, K., Caron, J.-B., Conway Morris, S. & Cameron, C. B. Cambrian suspension-feeding tubicolous hemichordates. *BMC Biol.* **14**, 9 (2016).
10. Nanglu, K. & Caron, J. Symbiosis in the Cambrian: enteropneust tubes from the Burgess Shale co-inhabited by commensal polychaetes. *Proc. R. Soc. B Biol. Sci.* (2021).
11. Bykova, N. *et al.* Seaweeds through time: Morphological and ecological analysis of Proterozoic and early Paleozoic benthic macroalgae. *Precambrian Res.* **350**, 105875 (2020).
12. LoDuca, S. T., Caron, J.-B., Schiffbauer, J. D., Xiao, S. & Kramer, A. A reexamination of *Yuknessia* from the Cambrian of British Columbia and Utah. *J. Paleontol.* **89**, 82–95 (2015).
