# Supplementary material for: A mid-Cambrian tunicate and the deep origin of the ascidiacean body plan
Source: PubMed Central journal article supplement (PMC10325964; doi:10.1038/s41467-023-39012-4), 2023-07-06
Supplement: 41467_2023_39012_MOESM2_ESM.pdf [file 41467_2023_39012_MOESM2_ESM.pdf]

### **Description of Additional Supplementary Files**

File Name: Supplementary Data 1

Description: Close up images of the longitudinal muscle bands of *Megasiphon thylakos*, indicated by white arrowheads.

File Name: Supplementary Data 2

Description: Bayesian phylogenetic tree including *Megasiphon thylakos*, placing it in a polytomy with the stolidobranchs and the majority of a paraphyletic “phlebobranch” clade. Refer to Methods for details of the analytical parameters.

File Name: Supplementary Code 1

Description: Character matrix used in the phylogenetic analysis of *Megasiphon thylakos*, adapted from Braun et al. 2020.
