# Supplementary material for: A mid-Cambrian tunicate and the deep origin of the ascidiacean body plan
Source: PubMed Central journal article supplement (PMC10325964; doi:10.1038/s41467-023-39012-4), 2023-07-06
Supplement: 41467_2023_39012_MOESM4_ESM.pdf [file 41467_2023_39012_MOESM4_ESM.pdf]

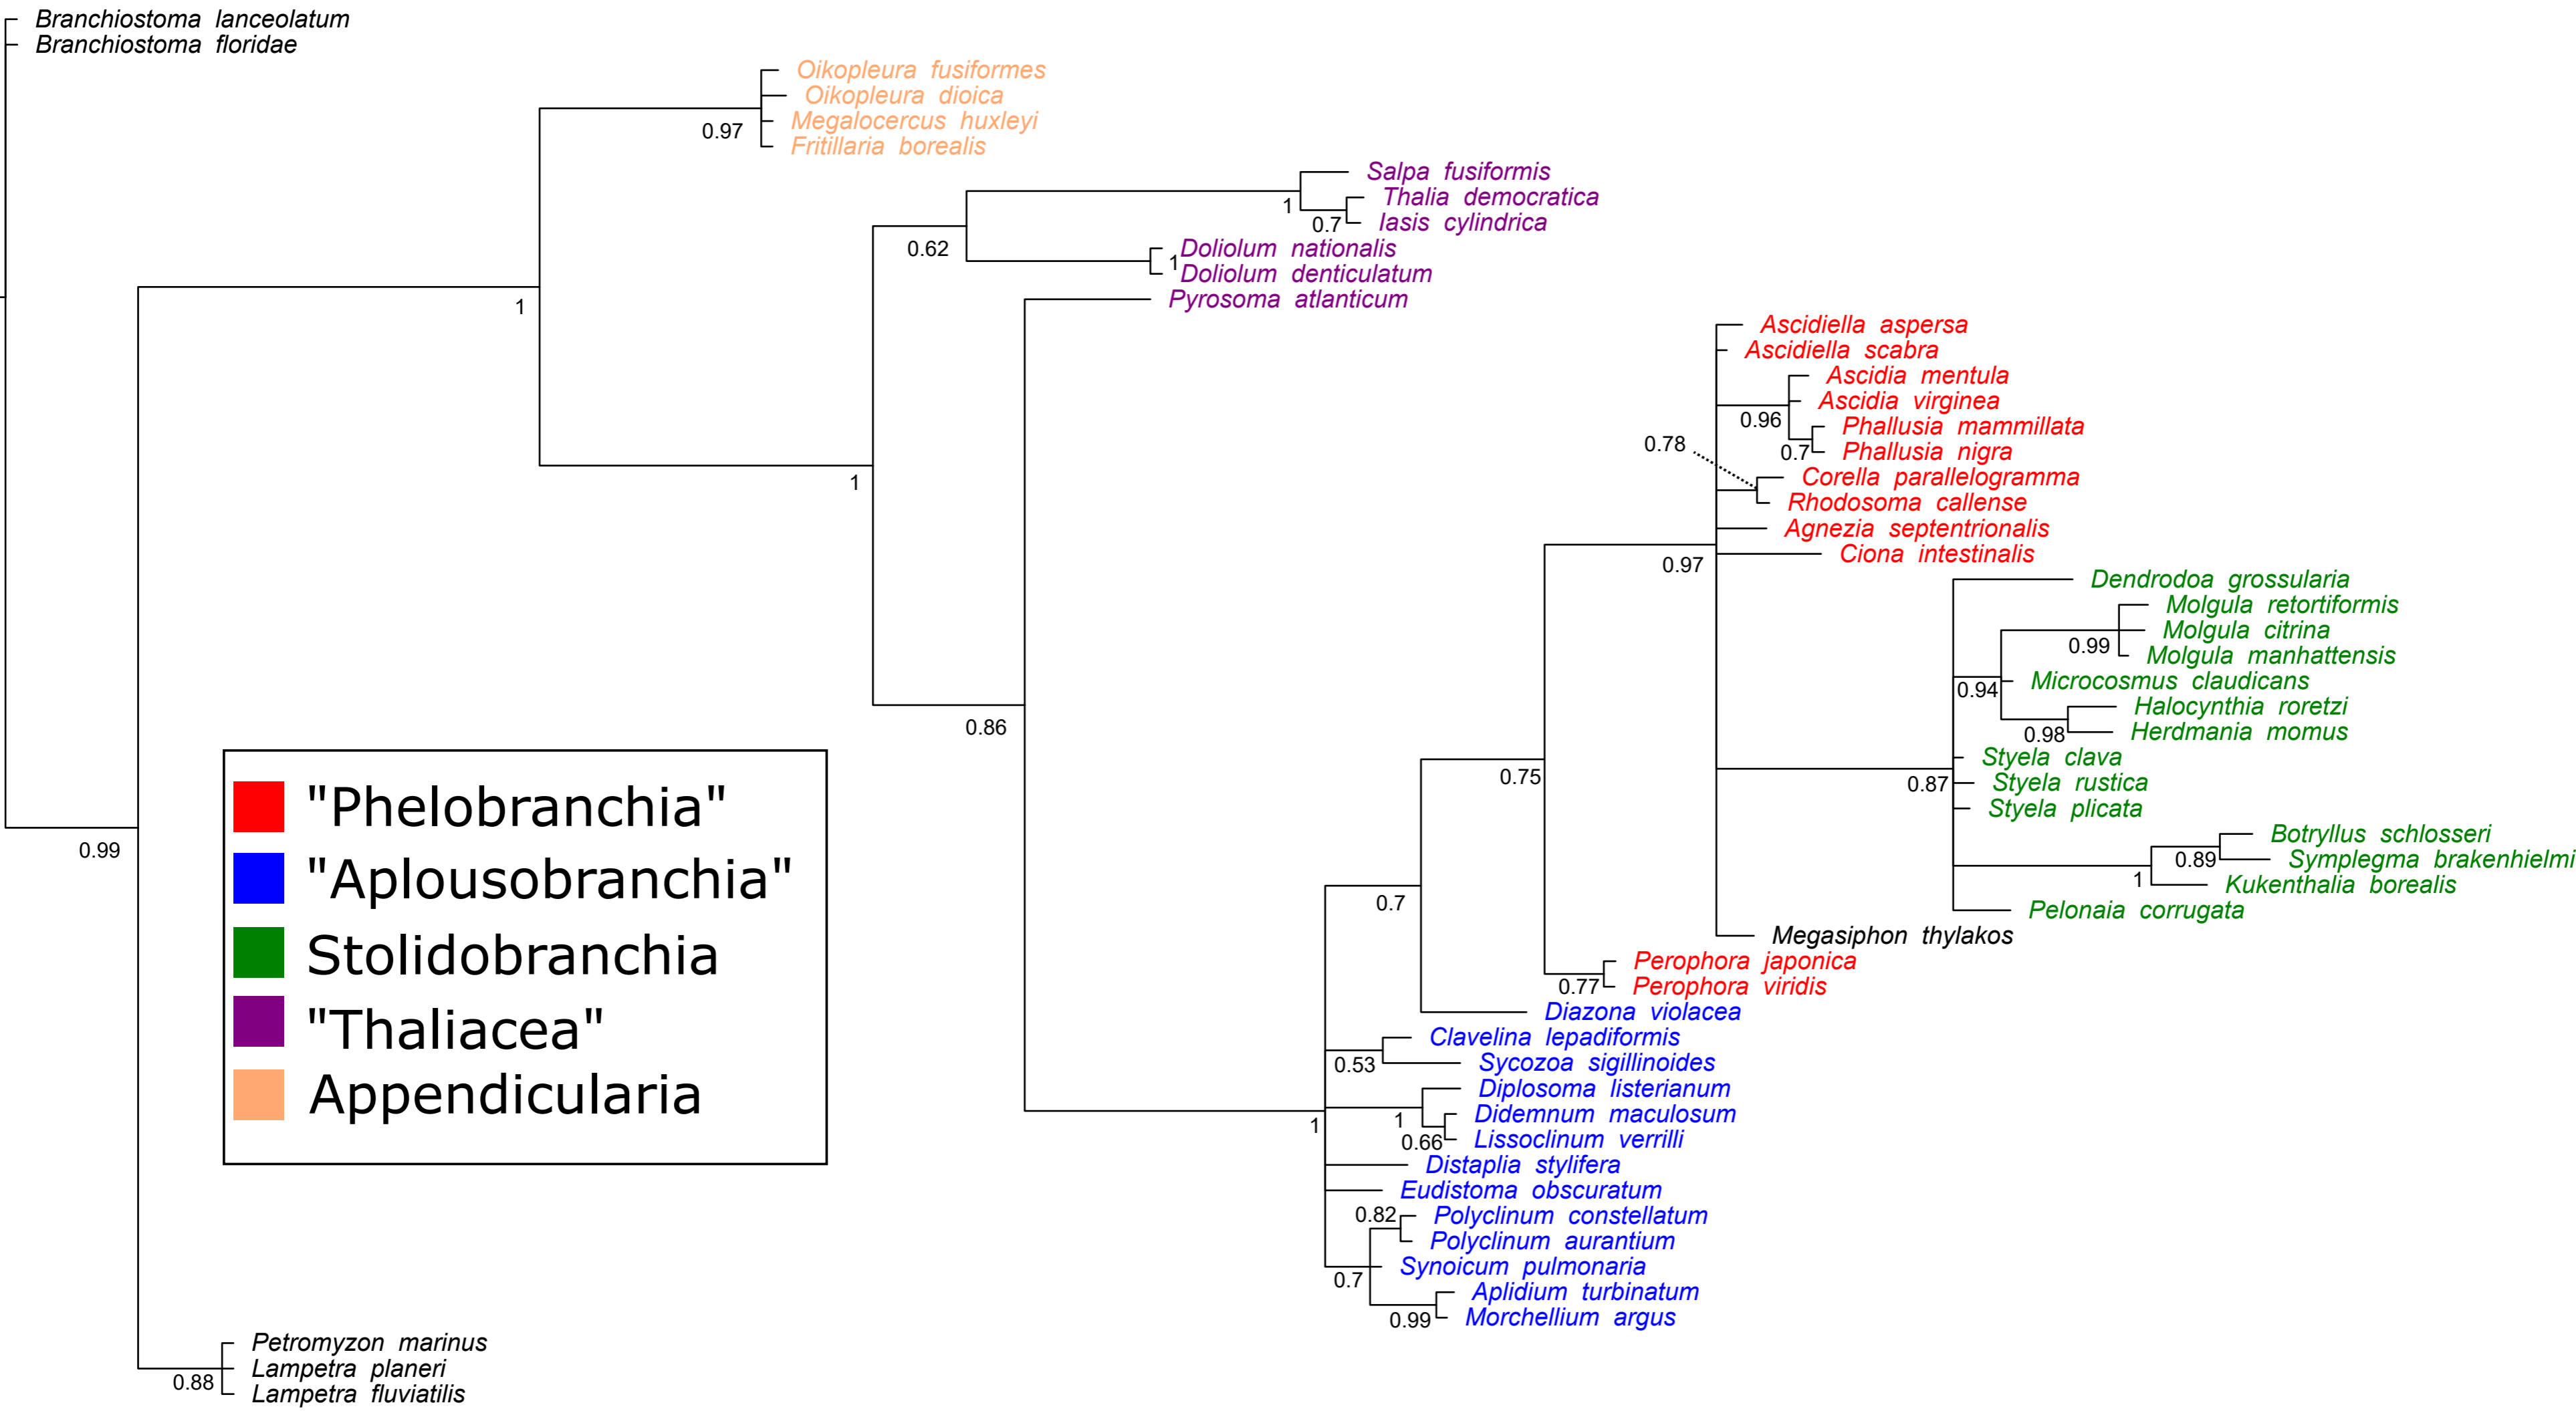

0.2
